# Supplementary material
Source: publisher figshare collection journal article supplement (https://tandf.figshare.com/articles/dataset/_/12198603)
Supplement: Supplementary file 1 [file 1]

**Comparative transcriptome analysis of differentially expressed genes between the fruit peel and flesh of the purple tomato cultivar ‘Indigo Rose’**

Xiaoxi Liu<sup>1</sup>, Yinggemei Huang<sup>2</sup>, Zhengkun Qiu<sup>2</sup> and Hao Gong<sup>1,\*</sup>

<sup>1</sup>Key Laboratory of New Technology Research of Vegetable, Vegetable Research Institute, Guangdong Academy of Agricultural Sciences, Guangzhou 510640, China

<sup>2</sup>Key Laboratory of Horticultural Crop Biology and Germplasm Innovation in South China, Ministry of Agriculture, College of Horticulture, South China Agricultural University, Guangzhou, 510642, China

\*Correspondence: [gonghaogz@21cn.com](mailto:gonghaogz@21cn.com); Tel.: +86-20-38469599 (H.G.)

**Supplementary Materials**

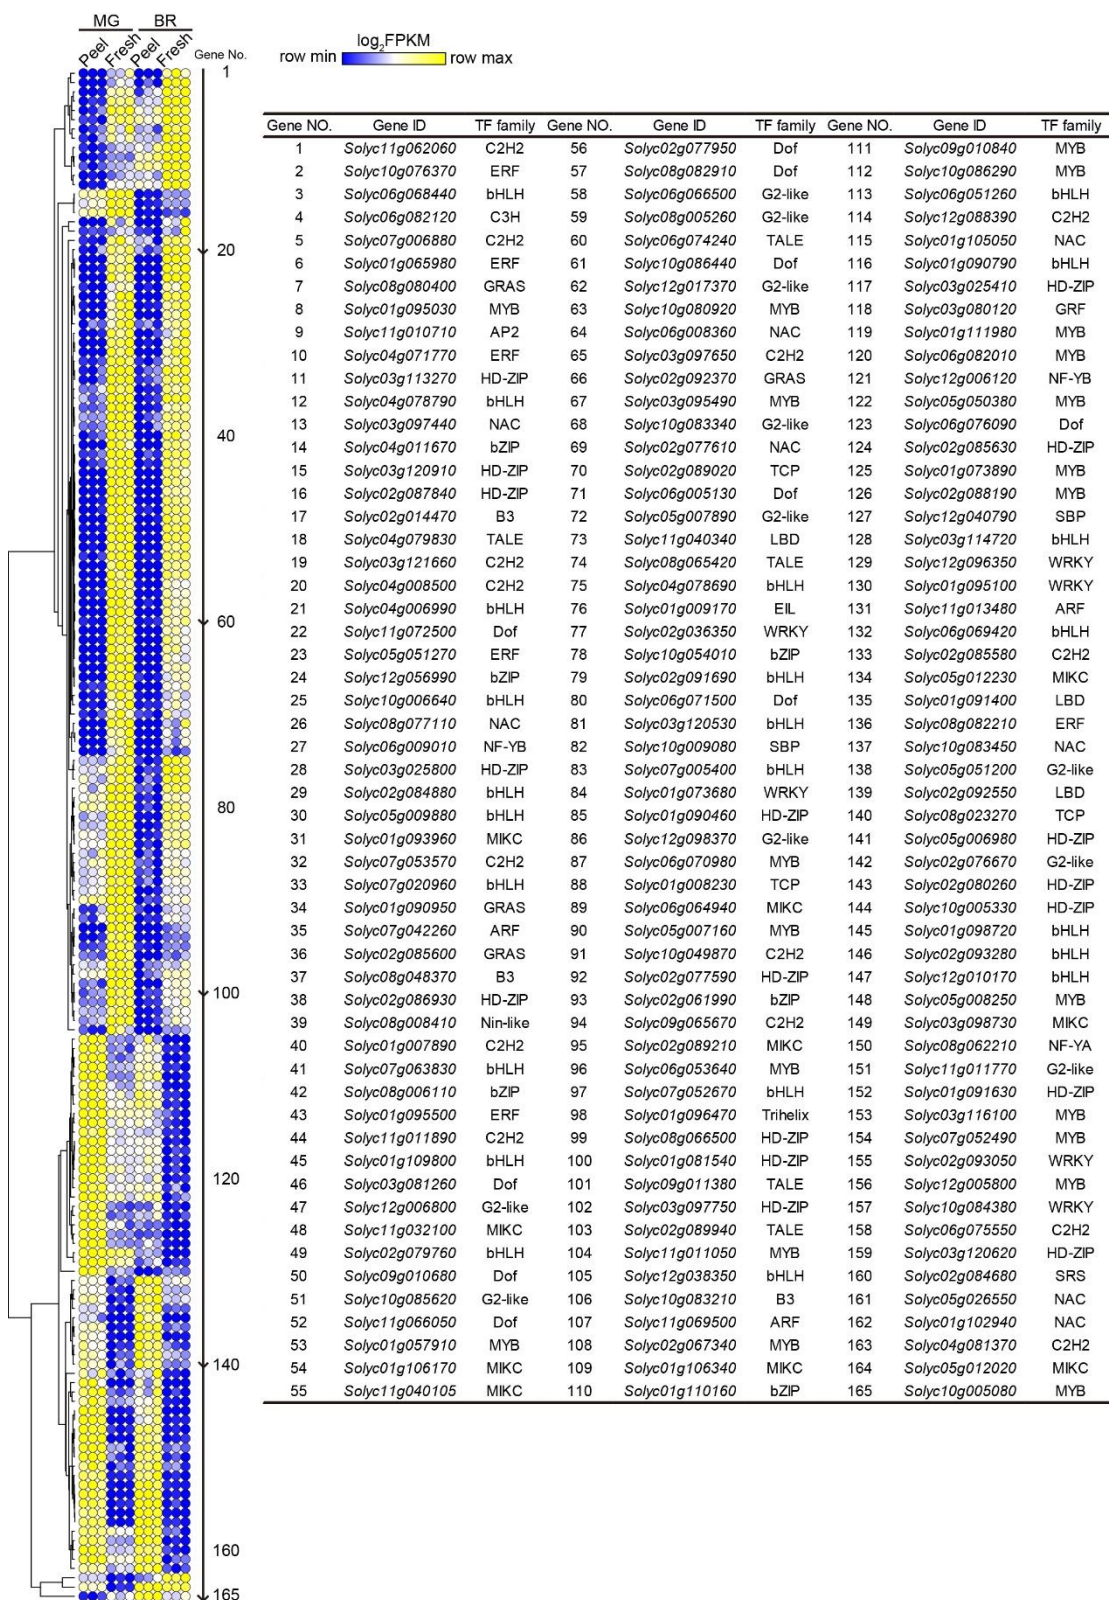

Figure S1. Transcription factors in the 1945 shared DEGs between fruit peel and flesh.

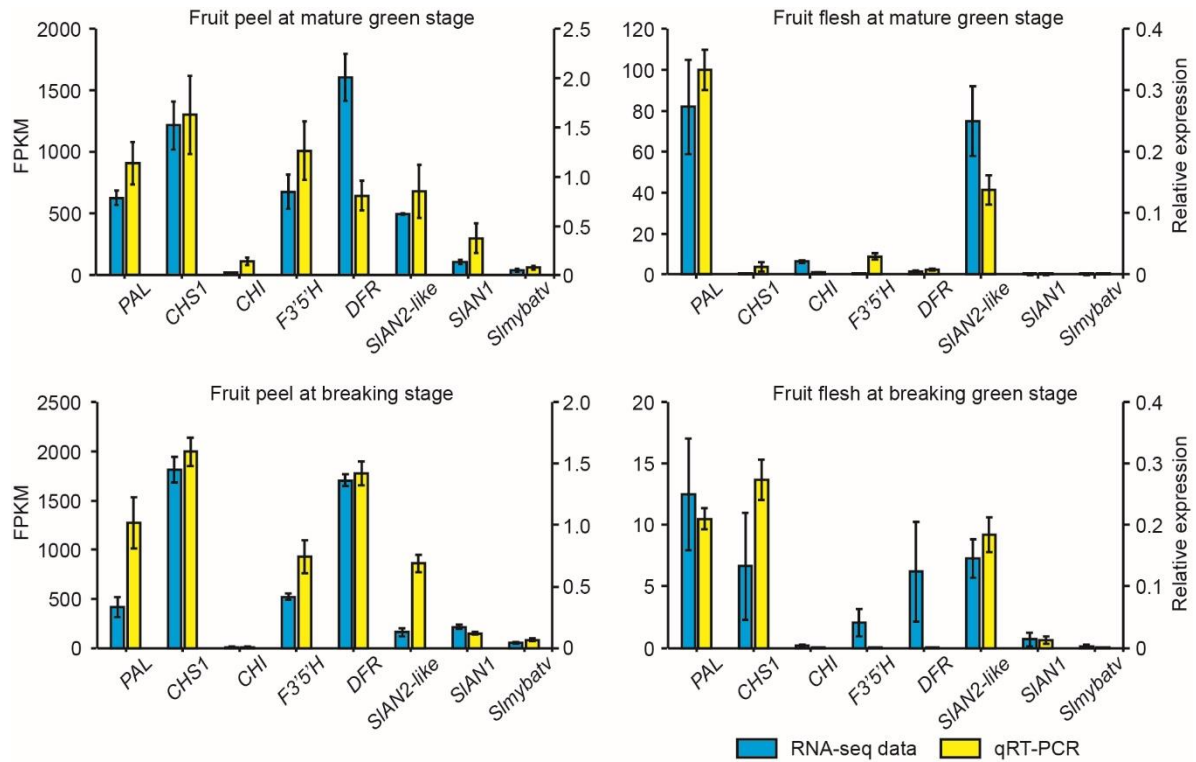

**Figure S2.** Confirmation of RNA-seq data by qRT-PCR. Eight anthocyanin-related genes were analyzed. The tomato ACTIN (Soly03g078400) gene was used as the reference gene. All of the analyses were performed with three technical replicated. Data are means of relative expression levels of three biological replicates $\pm$ standard error.
